# Supplementary material
Source: MDPI journal article supplement (https://www.mdpi.com/1660-4601/20/3/2589)
Supplement: s1 [file s1]

Archive with 1 entries (1 files):
- ijerph-2116885-Supplementary.pdf
